# Supplementary material for: Inhibiting USP8 overcomes hepatocellular carcinoma resistance via suppressing receptor tyrosine kinases
Source: publisher site journal article supplement (doi:10.18632/aging.203061), 2021-06-03
Supplement: Supplementary file [file aging-v13i11-203061-supplementary-material-SD2.pdf]

## SUPPLEMENTARY TABLE

Supplementary Table 1. HCC patients' information.

| Patient number | Age | TNM stage | HBV | HCV | T/N ratio (USP8) |
|----------------|-----|-----------|-----|-----|------------------|
| HCC#1          | 34  | III       | +   | -   | 1.30             |
| HCC#2          | 46  | III       | -   | -   | 2.67             |
| HCC#3          | 45  | I         | +   |     | 1.77             |
| HCC#4          | 57  | II        | -   | +   | 0.73             |
| HCC#5          | 68  | II        | -   | -   | 0.45             |
| HCC#6          | 72  | II        | -   | -   | 3.75             |
| HCC#7          | 58  | III       | -   | -   | 2.08             |
| HCC#8          | 76  | II        | +   | -   | 1.80             |
| HCC#9          | 44  | II        | +   | -   | 2.36             |
| HCC#10         | 65  | I         | +   | -   | 2.25             |
| HCC#11         | 64  | I         | +   | -   | 2.00             |
| HCC#12         | 75  | II        | -   | -   | 2.56             |
| HCC#13         | 61  | II        | -   | -   | 1.67             |
| HCC#14         | 54  | III       | -   | -   | 2.00             |
| HCC#15         | 67  | II        | -   | +   | 0.92             |
| HCC#16         | 63  | II        | -   | -   | 2.00             |
| HCC#17         | 73  | II        | +   | -   | 1.07             |
| HCC#18         | 49  | III       | +   | -   | 1.79             |
| HCC#19         | 49  | II        | +   | -   | 2.39             |
| HCC#20         | 82  | I         | -   | -   | 1.30             |
